# Supplementary material
Source: HighWire-hosted journal article supplement (https://erj.ersjournals.com/content/49/1/1600839)
Supplement: inline-supplementary-material-1 [file inline-supplementary-material-1.pdf]

## **Airway Inflammation in COPD after Long-term Withdrawal of Inhaled Corticosteroids**

Lisette I.Z. Kunz, N.H.T. ten Hacken, Thérèse S. Lapperre, Wim Timens, H.A.M. Kerstjens, A. van Schadewijk, Judith M. Vonk, Jacob K. Sont, Jiska B. Snoeck-Stroband, Dirkje S. Postma, Peter J. Sterk, Pieter S. Hiemstra, and the GLUCOLD Study Group<sup>1</sup>

### **Supplementary Tables**

**Supplementary Table 1:** Fold change per year in inflammatory cells in bronchial biopsies during GL1, GL2 and difference between GL2 versus GL1. Data are presented as fold change per year with 95% confidence interval for patients who used 0-50% ICS during GL2. Data are calculated by taking the antilog of the estimates (data from the linear mixed-effect models) of natural log-transformed cells per 0.1mm<sup>2</sup> lamina propria and represent ratios. A factor greater than 1.0 implies an increase in the number of cells, a factor less than 1.0 implies a decrease in the number of cells.

\* P≤0.05: slope change in bronchial inflammatory cells between GL2 minus GL1.

<sup>q</sup> P≤0.05: slope change in bronchial inflammatory cells between original combined FS30/F30 groups compared to the original combined F6/placebo groups.

|                        | GL1                 | GL2                 | GL2 - GL1                         |
|------------------------|---------------------|---------------------|-----------------------------------|
| FS30/F30 groups        |                     |                     |                                   |
| CD3 <sup>+</sup> cells | 0.55 (0.45 to 0.70) | 1.50 (1.21 to 1.85) | 2.68 (1.87 to 3.84) <sup>*q</sup> |
| CD4 <sup>+</sup> cells | 0.60 (0.47 to 0.75) | 1.14 (0.92 to 1.41) | 1.91 (1.33 to 2.75) <sup>*</sup>  |
| CD8 <sup>+</sup> cells | 0.71 (0.55 to 0.91) | 1.21 (0.96 to 1.52) | 1.71 (1.15 to 2.53) <sup>*q</sup> |
| Mast cells             | 0.59 (0.48 to 1.36) | 1.13 (0.94 to 1.37) | 1.91 (1.36 to 2.68) <sup>*q</sup> |
| Neutrophils            | 1.27 (1.00 to 1.62) | 1.07 (0.85 to 1.33) | 0.84 (0.57 to 1.23)               |
| Macrophages            | 0.76 (0.54 to 1.06) | 1.17 (0.86 to 1.61) | 1.51 (0.91 to 2.67)               |
| Eosinophils            | 1.44 (0.93 to 2.23) | 0.93 (0.62 to 1.39) | 0.65 (0.33 to 1.28)               |
| F6/placebo groups      |                     |                     |                                   |
| CD3 <sup>+</sup> cells | 0.75 (0.65 to 0.86) | 1.15 (1.05 to 1.26) | 1.55 (1.27 to 1.89) <sup>*</sup>  |
| CD4 <sup>+</sup> cells | 0.69 (0.57 to 0.83) | 1.07 (0.95 to 1.21) | 1.56 (1.19 to 2.03) <sup>*</sup>  |
| CD8 <sup>+</sup> cells | 1.00 (0.80 to 1.25) | 1.00 (0.86 to 1.15) | 0.99 (0.72 to 1.36)               |
| Mast cells             | 0.81 (0.72 to 1.09) | 1.04 (0.96 to 1.13) | 1.28 (1.07 to 1.53) <sup>*</sup>  |
| Neutrophils            | 1.22 (0.99 to 1.50) | 0.95 (0.83 to 1.08) | 0.78 (0.58 to 1.05)               |
| Macrophages            | 0.95 (0.75 to 1.21) | 1.22 (1.04 to 1.42) | 1.28 (0.91 to 1.81)               |
| Eosinophils            | 1.21 (0.85 to 1.72) | 1.21 (0.96 to 1.53) | 1.01 (0.60 to 1.67)               |

GL1: first part of the GLUCOLD-study; GL2: follow-up study; F6/placebo: combination of original treatment groups with 6-month ICS (followed by 24-month placebo) and placebo group. FS30/F30: combination of original treatment groups with 30-month fluticasone with salmeterol and 30-month fluticasone.

**Supplementary Table 2:** Fold change per year in sputum inflammatory cells during GL1, GL2 and difference between GL2 versus GL1. Data are presented fold change per year with 95% confidence interval for patients who used 0-50% ICS during GL2. Data are calculated as the antilog of estimates (from the linear mixed-effect models) of natural log-transformed cells  $\times 10^4$  per ml and represent ratios. A factor greater than 1.0 implies an increase in the number of cells, a factor less than 1.0 implies a decrease in the number of cells.

\*  $P \leq 0.05$  slope change in sputum cells between GL2 versus GL1.

<sup>q</sup>  $P \leq 0.05$ : slope change in sputum inflammatory cells between original combined FS30/F30 groups compared to the original combined F6/placebo groups

|                          | GL1                 | GL2                 | GL2 - GL1                          |
|--------------------------|---------------------|---------------------|------------------------------------|
| <b>FS30/F30 groups</b>   |                     |                     |                                    |
| Total cells              | 0.60 (0.50 to 1.36) | 1.15 (0.99 to 1.33) | 1.90 (1.41 to 2.54) <sup>* q</sup> |
| Neutrophils              | 0.60 (0.49 to 1.34) | 1.16 (0.99 to 1.36) | 1.92 (1.39 to 2.65) <sup>* q</sup> |
| Macrophages              | 0.55 (0.45 to 0.68) | 1.17 (1.00 to 1.36) | 2.10 (1.55 to 2.86) <sup>* q</sup> |
| Lymphocytes              | 0.62 (0.50 to 0.77) | 1.26 (1.07 to 1.47) | 2.01 (1.46 to 2.78) <sup>* q</sup> |
| Eosinophils              | 0.75 (0.60 to 0.96) | 1.03 (0.86 to 1.24) | 1.36 (0.95 to 1.95)                |
| <b>F6/placebo groups</b> |                     |                     |                                    |
| Total cells              | 0.87 (0.72 to 1.05) | 0.99 (0.88 to 1.11) | 1.14 (0.87 to 1.49)                |
| Neutrophils              | 0.87 (0.72 to 1.07) | 0.99 (0.88 to 1.13) | 1.14 (0.86 to 1.51)                |
| Macrophages              | 0.88 (0.73 to 1.07) | 0.98 (0.87 to 1.10) | 1.11 (0.84 to 1.46)                |
| Lymphocytes              | 0.90 (0.72 to 1.12) | 1.04 (0.91 to 1.20) | 1.16 (0.84 to 1.59)                |

|             |                     |                     |                     |
|-------------|---------------------|---------------------|---------------------|
| Eosinophils | 0.97 (0.76 to 1.23) | 0.99 (0.86 to 1.15) | 1.03 (0.73 to 1.44) |
|-------------|---------------------|---------------------|---------------------|

---

GL1: first part of the GLUCOLD-study; GL2: follow-up study; F6/placebo: combination of original treatment groups with 6-month ICS followed by 24-month placebo and placebo group. FS30/F30: combination of original treatment groups with 30-month fluticasone with salmeterol and 30-month fluticasone.

## Supplementary figures

**Figure S1.** Geometric mean cell counts per 0.1 mm<sup>2</sup> lamina propria in bronchial biopsies over time for all patients from the original combined treatment groups FS30/F30 and F6/placebo. Error bars represent 95% confidence interval. Data of bronchial CD3<sup>+</sup> cells (Figure S1A), CD4<sup>+</sup> cells (S1B), CD8<sup>+</sup> cells (S1C) and mast cells (S1D) are presented. Data were calculated by taking the antilog of the means of natural log-transformed number of cells.

**Figure S2.** Geometric mean change in sputum cell counts ( $\times 10^4$  per ml) over time for all patients from the original combined treatment groups FS30/F30 and F6/placebo. Error bars represent 95% confidence interval. Data of total sputum cells (Figure S2A), neutrophils (S2B), macrophages (S2C) and lymphocytes (S2D). Data were calculated by taking the antilog of the means of natural log-transformed number of cells.
